# Supplementary material
Source: PubMed Central journal article supplement (PMC3057852)
Supplement: supp_M110.179184_jbc.M110.179184-1.pdf [file supp_M110.179184_jbc.M110.179184-1.pdf]

1  
2  
3 **SUPPLEMENTARY INFORMATION**

4 **SMALL-MOLECULE INHIBITORS THAT SELECTIVELY BLOCK DENGUE VIRUS**  
5 **METHYLTRANSFERASE**

6 **Siew Pheng Lim<sup>1,\*</sup>, Louis Sebastian Sonntag<sup>1</sup>, Christian Noble<sup>1</sup>, Shahul H. Nilar<sup>1</sup>, Ru Hui**  
7 **Ng<sup>1</sup>, Gang Zou<sup>1</sup>, Paul Monaghan<sup>1</sup>, Ka Yan Chung<sup>2</sup>, Hongping Dong<sup>1</sup>, Boping Liu<sup>1</sup>,**  
8 **Christophe Bodenreider<sup>1</sup>, Gladys Lee<sup>1</sup>, Mei Ding<sup>1</sup>, Wai Ling Chan<sup>1</sup>, Gang Wang<sup>1</sup>, Yap**  
9 **LiJian<sup>2</sup>, Alexander Theodore Chao<sup>1</sup>, Julien Lescar<sup>2</sup>, Zheng Yin<sup>1</sup>, Vedananda TR<sup>3</sup>, Thomas**  
10 **H. Keller<sup>1</sup>, and Pei-Yong Shi<sup>1,\*</sup>**

11 <sup>1</sup>Novartis Institute for Tropical Diseases, 10 Biopolis Road, #05-01 Chromos, Singapore, <sup>2</sup>School  
12 of Biological Sciences, Nanyang Technological University, 60, Nanyang Drive, Singapore,

13 <sup>3</sup>Novartis Institutes for BioMedical Research, Cambridge, MA 02139, USA.

14 Running title: Selective inhibitors of dengue virus methyltransferase

15 Address correspondence to: Siew Pheng Lim (SPL) or Pei-Yong Shi (PYS), 10 Biopolis Road,  
16 #05-01 Chromos, Singapore 138670. SPL: Phone: (65)-67222924; Fax: (65)-67222916; E-mail:  
17 [siew\\_pheng.lim@novartis.com](mailto:siew_pheng.lim@novartis.com). PYS: Phone: (65)-67222909; Fax: (65)-67222916; E-mail:

18 [pei\\_yong.shi@novartis.com](mailto:pei_yong.shi@novartis.com)

19  
20  
21  
22 **Supplementary Fig. 1.** Identification of SAM bound to DENV MTase. (A) DENV-3 MTase was  
23 denatured in buffer (50mM Tris/HCl, pH 7.5, 100 mM NaCl) containing 6 M urea to separate co-  
24 purified bound ligand. The protein solution was passed through a desalting PD10 column. The  
25 initial flow-through and each subsequent 1-ml eluate were collected, and their absorbance  
26 readings at OD<sub>260</sub> and OD<sub>280</sub> nm were determined. DENV-3 MTase was mainly found in fractions  
27 1-3, whilst an unknown ligand (likely SAH or SAM) that strongly absorbed at A<sub>260</sub> eluted mostly  
28 in fractions 5-8. Molar concentrations of SAM/SAH present in the fractions were calculated from  
29 the molar extinction of SAM (molar extinction coefficient SAM at OD<sub>260</sub> = 15400 ; ie 1M SAM  
30 absorbs 15400 units at OD 260nm) to convert the A<sub>260</sub> absorbance values to molar  
31 concentration. Quantification of their concentrations suggest that 7 molecules of ligand bind to  
32 every 10 molecules of MTase. (B) Fractions 6 and 7 were diluted to give SAM/SAH  
33 concentrations ranging from 10<sup>-5</sup> to 10<sup>-9</sup> M and used to compete against SAH-tracer for binding  
34 to the anti-SAH antibody (IMx homocysteine FPIA kit; Abbott Laboratories, IL,USA) in a  
35 competitive fluorescence polarization assay as described in Graves et al (2008). SAH and SAM  
36 were used as controls. The anti-SAH antibody binds SAM with 20-100-fold poorer affinity  
37 compared to SAH (Graves et al., 2008). Competitive binding of the various ligands to the  
38 antibody-tracer complex was used to determine their IC<sub>50</sub> values which was calculated from the  
39 four parameter logistic equation (Finney, 1976; Cheng and Prusoff, 1973). (C) Summary table  
40 showing the IC<sub>50</sub> values of SAH, SAM and the ligand present in fractions 6 and 7. SAH gave an  
41 IC<sub>50</sub> value of 12.1 nM, whilst the IC<sub>50</sub> value of SAM was much higher (259.5 nM). These results  
42 are comparable to previous observations (Graves et al., 2008). Both fractions 6 and 7 contained a  
43 ligand that showed similar competitive properties as SAM, with high IC<sub>50</sub> values of 479.5 and  
44 382.5 nM, respectively. This indicates that they contained SAM and not SAH, and that DENV-3  
45 MTase purified from bacteria cells is bound with SAM.

**A**

| Samples      | Absorbance $A_{260}$ | Absorbance $A_{280}$ | Ratio $A_{280}/A_{260}$ | MTase or Ligand ( $\mu\text{M}$ ) | Total amount (nmoles) |
|--------------|----------------------|----------------------|-------------------------|-----------------------------------|-----------------------|
| Flow-through | 0.998                | 1.252                | 1.25                    |                                   |                       |
| Fraction 1   | 0.5                  | 0.855                | 1.71                    | 18.6                              |                       |
| Fraction 2   | 0.729                | 1.245                | 1.71                    | 27.1                              |                       |
| Fraction 3   | 0.626                | 1.073                | 1.71                    | 23.3                              | 68.9 (MTase)          |
| Fraction 4   | 0.08                 | 0.06                 |                         |                                   |                       |
| Fraction 5   | 0.169                | 0.053                | 0.31                    | 11.0                              |                       |
| Fraction 6   | 0.262                | 0.072                | 0.27                    | 17.0                              |                       |
| Fraction 7   | 0.216                | 0.063                | 0.29                    | 14.0                              |                       |
| Fraction 8   | 0.111                | 0.038                | 0.34                    | 7.2                               | 49.2 (SAM)            |
| Fraction 9   | 0.03                 | 0.02                 | 0.67                    |                                   |                       |
| Fraction 10  | 0                    | 0                    |                         |                                   |                       |

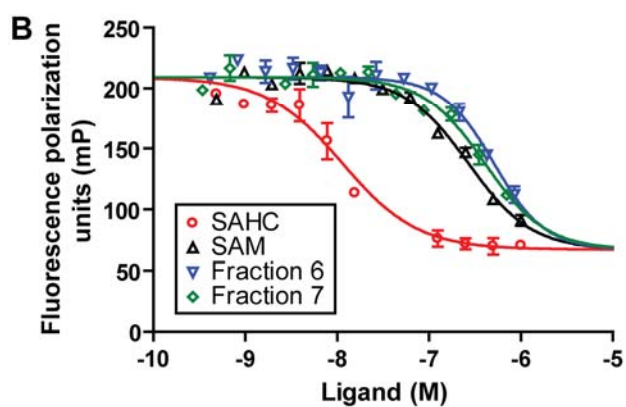**C**

| Ligand     | $\text{IC}_{50}$ (nM) |
|------------|-----------------------|
| SAH        | 12.06                 |
| SAM        | 259.5                 |
| Fraction 6 | 479.5                 |
| Fraction 7 | 382.8                 |

1  
2  
3  
4  
5  
6  
7  
8  
9  
10  
11  
12  
13  
14  
15  
16  
17  
18  
19  
20  
21  
22  
23  
24

1 **Supplementary Fig. 2.** Transient replication of wild-type (WT) and mutant replicons of DENV-  
2 2. (A) A luciferase-reporting replicon of DENV-2. The viral structural CprME genes were  
3 replaced with a *Renilla* luciferase reporter. (B) Replication of WT and mutant replicons of  
4 DENV-2. Two mutations (R160A and R163A) were individually engineered into the luciferase-  
5 reporting replicon of DENV-2. A mutant replicon containing an inactive viral RNA-dependent  
6 RNA polymerase (RdRp mt) was included as a negative control. The replicons were transfected  
7 into BHK-21 cells and assayed for luciferase activities at indicated time points post-transfection.  
8 Average results of triplicate experiments are shown. The assay was performed as previously  
9 described (Shi et al., 2002).

10  
11

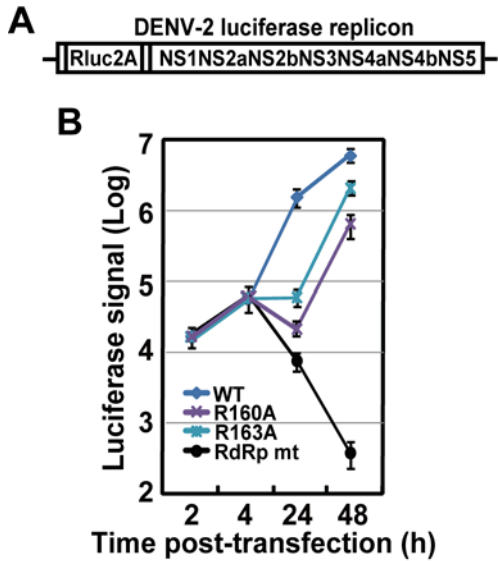

12

1 **Supplementary Fig. 3.** Recombinant WT and mutant DENV4 MTases. Recombinant MTase  
 2 proteins were expressed and purified as described in Methods. The proteins were analyzed on a  
 3 10% SDS-PAGE gel stained with coomassie blue. Lanes 1-6 denote WT, F133A, G148A,  
 4 R160A, R163A, and L182A MTase, respectively. Molecular mass standards were labeled on the  
 5 left side of the gel. Arrow indicates the purified DENV MTases.  
 6

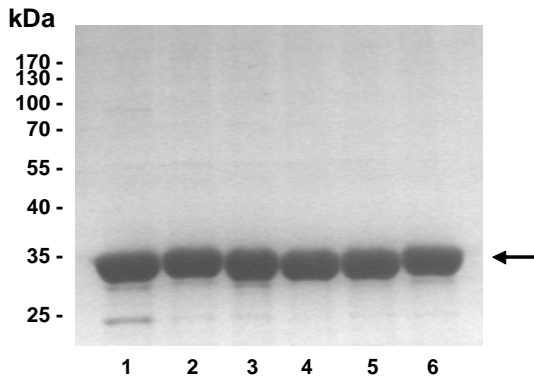

7  
 8  
 9  
 10

11 **Supplementary Table.** Primer sequences

| Primer           | Sequence                                                                                                               |
|------------------|------------------------------------------------------------------------------------------------------------------------|
| hRNMT-RT-REV     | 5'-GAGTTGTTCAAATTTGTGCA-3'                                                                                             |
| hRNMT-Xho-FOR    | 5'-TACTACTCGAGATGGCAAATTCTGCAAAAGC-3'                                                                                  |
| hRNMT-Bam-REV    | 5'-GCCGGATCCTCACTGCTGTTTCTCAAAGG-3'                                                                                    |
| hDNMT sense      | 5'-biotin-<br>GATCCGAC*GAC*GAC*GC*GC*GC*GC*GAC*GAC*GAGATC-3'<br>(Symbol * indicates that the adjacent C is methylated) |
| hDNMT anti-sense | 5'-GATCTCGTCGTCGCGCGCGTCGTCGGATC-3'                                                                                    |

12

## COMPOUND SYNTHESIS

### Synthesis of compounds 1-12

**General Methods.** Reagents and building blocks from commercial sources were used without further purification. Reactions were routinely run under a dry nitrogen atmosphere using standard techniques. Reaction progress was monitored using silica gel plates. Thin layer chromatography (TLC) was carried out on Merck silica gel 60 F254 (2.5 × 7.5 cm) using UV light ( $\lambda = 254\text{nm}$ ) or  $\text{KMnO}_4$  stain for visualization.  $^1\text{H}$  NMR and  $^{13}\text{C}$  NMR spectra were determined on a Varian 300 Mercury spectrometer. Chemical shifts ( $\delta$ ) are expressed in ppm. LC-MS analyses were performed with an Agilent LC1100 coupled with an Applied Biosystems API2000, using the following conditions: monolithic-C18, 50 × 4.6 mm column; mobile system of acetonitrile/water with 0.1% of formic acid with a gradient of 5-95% acetonitrile; run time of 4 min; UV 254 and 214 nm; and flow rate of 3 mL/min.

HPLC purity determinations were performed using an Agilent LC1100 HPLC, and the following conditions: SymmetryShield RP-18 3.5 $\mu\text{m}$ , 150 × 4.6 mm column; mobile system of acetonitrile/water with 0.1% of formic acid with a gradient of 5-95% acetonitrile; run time of 20 min; UV 254 and 214 nm; and flow rate of 0.8 mL/min. UPLC-MS was performed using a Waters Acquity UPLC-MS (ZQ2000) with an Acquity C18 Column, 2.1x50mm, 1.7 $\mu\text{m}$ , with 0.1% of formic acid with a gradient of 5-95% acetonitrile; run time of 3 min; UV 210-400nm; and flow rate of 0.8 mL/min. HPLC purification was carried out on a Waters Prep LC with an Atlantis C18, 10 $\mu\text{m}$ , 19 × 250 mm column; mobile system of acetonitrile/water with 0.1% of formic acid; run time of 40 min; UV 254 and 214 nm; and flow rate of 20 mL/min.

### Synthesis of compounds 1 and 3

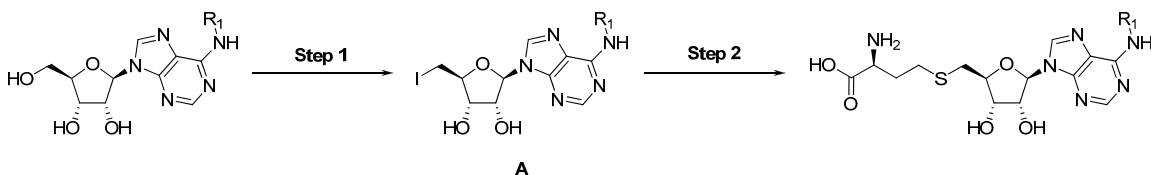

#### General procedure for Step 1:

The 6-substituted adenosine (0.44mmol, 1 equiv.) and triphenylphosphine (0.88mmol, 2 equiv.) were dissolved in anhydrous dimethylformamide (3mL), cooled to 0°C and stirred under a blanket of argon. N-Iodosuccinimide (0.88mmol, 2 equiv.) was added to the solution at 0°C. The reaction mixture was warmed to 50°C and heated for 8 hours at this temperature, then allowed to cool to room temperature and stirred overnight. The resulting suspension was filtered and purified directly by reverse phase preparative column chromatography.

#### General procedure for Step 2:

L-Homocysteine monosodium salt (0.44mmol, 10 equiv.) was added to **A** (0.044mmol, 1 equiv.) in water (3mL) and 1,4-dioxane (1mL) to give a suspension. The pH value of the suspension was adjusted to pH10 with sodium hydroxide (1M in  $\text{H}_2\text{O}$ ) and was heated to reflux at 90°C for 4 hours. The reaction mixture was filtered and purified directly by reverse phase preparative column chromatography.

**(S)-2-Amino-4-[(2S,3S,4R,5R)-3,4-dihydroxy-5-(6-methylamino-purin-9-yl)-tetrahydrofuran-2-ylmethylsulfanyl]-butyric acid (1,  $\text{R}_1 = \text{Me}$ ).** The title compound was prepared following the general procedures for step 1 and step 2. It was purified by reverse phase preparative column chromatography using acetonitrile and water with 0.1% formic acid as solvents to give compound **1** (0.0104g, 15.4%).

1 <sup>1</sup>H NMR (300 MHz, D<sub>2</sub>O) δ ppm 8.27 (s, 1 H), 8.21 (s, 1 H), 6.04 (d, *J*=5.3 Hz, 1 H), 4.82 (t,  
2 *J*=5.3 Hz, 1 H), 4.40 (t, *J*=5.1 Hz, 1 H), 4.27 - 4.36 (m, 1 H), 3.75 - 3.84 (m, 1 H), 3.07 (s, 3 H),  
3 2.91 - 3.05 (m, 2 H), 2.68 (t, *J*=7.6 Hz, 2 H), 1.97 - 2.22 (m, 2 H). ES-MS: calcd. for  
4 C<sub>15</sub>H<sub>22</sub>N<sub>6</sub>O<sub>5</sub>S (398.44); found (pos.): 399.30 [M+H].

5  
6 **(S)-2-Amino-4-[(2S,3S,4R,5R)-3,4-dihydroxy-5-(6-phenylamino-purin-9-yl)-tetrahydro-**  
7 **furan-2-ylmethylsulfanyl]-butyric acid (3, R<sub>1</sub>=Ph).** The compound was prepared following the  
8 general procedures for step 1 and step 2. It was purified by reverse phase preparative column  
9 chromatography using acetonitrile and water with 0.1% formic acid as solvents to give compound  
10 **3** (0.002g, 10%).

11 <sup>1</sup>H NMR (300 MHz, METHANOL-*d*<sub>4</sub>) δ ppm 8.41 (s, 1 H), 8.36 (s, 1 H), 7.64 (m, 2 H), 7.46 (m,  
12 2 H), 7.25 (m, 1 H), 6.08 (d, *J*=5.1 Hz, 1 H), 4.82 - 4.86 (m, 1 H), 4.40 (t, *J*=5.1 Hz, 1 H), 4.31 (m,  
13 1 H), 3.78 (dd, *J*=7.1, 5.4 Hz, 1 H), 2.93 - 3.14 (m, 2 H), 2.78-2.70 (m, 2 H), 2.00 - 2.29 (m, 2 H).  
14 ES-MS: calcd. for C<sub>20</sub>H<sub>24</sub>N<sub>6</sub>O<sub>5</sub>S (460.52); found (pos.): 461.40 [M+H].

### 15 **Synthesis of compounds SAH, 2, and 4-12**

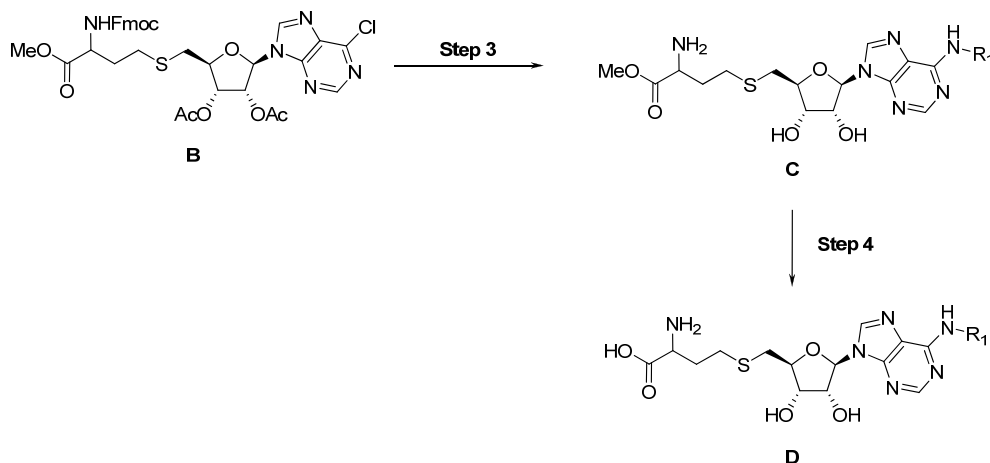

#### 18 **General procedure for Step 3:**

19  
20 Triethylamine (8.60mmol, 61 equiv.) was added to a solution of 6-chloro-adenosine analogue **B**  
21 (0.14mmol, 1 equiv.) and the amine (2.74mmol, 20 equiv.) in anhydrous 1,4-dioxane (3mL). The  
22 reaction mixture was subjected to microwave irradiation at 90°C and heated for 20 min. The  
23 reaction mixture was filtered and purified directly by reverse phase preparative column  
24 chromatography to give product **C**.  
25  
26

#### 27 **General procedure for Step 4:**

28 Lithium hydroxide (4M in H<sub>2</sub>O, 1mL) was added to **C** (0.04mmol, 1 equiv.) and the suspension  
29 was stirred at room temperature for 1 hour. The reaction mixture was neutralized to pH7.0 using  
30 formic acid. The neutralized solution was filtered and purified directly by reversed phase  
31 preparative column chromatography.  
32

#### 33 **2-Amino-4-[(2S,3S,4R,5R)-5-[6-cyclopropylamino-purin-9-yl]-3,4-dihydroxy-tetrahydro-** 34 **furan-2-ylmethylsulfanyl]-butyric acid (2, R<sub>1</sub>=cyclopropyl).**

35 The title compound was prepared from **B** according to the general procedure for step 3 and step 4  
36 providing 0.0026g, 68.1% of **2**.

37 <sup>1</sup>H NMR (300 MHz, D<sub>2</sub>O) δ ppm 8.27 - 8.30 (m, 2 H), 6.05 (d, *J*=5.1 Hz, 1 H), 4.82 (t, *J*=5.3 Hz,  
38 1 H), 4.39 (t, *J*=4.9 Hz, 1 H), 4.26 - 4.34 (m, 1 H), 3.73 - 3.81 (m, 1 H), 2.89 - 3.08 (m, 2 H), 2.78

1 - 2.89 (m, 1 H), 2.60 - 2.70 (m, 2 H), 1.96 - 2.20 (m, 2 H), 0.85 - 0.95 (m, 2 H), 0.63 - 0.72 (m, 2  
2 H). ES-MS: calcd. for C<sub>17</sub>H<sub>24</sub>N<sub>6</sub>O<sub>5</sub>S (424.48); found (pos.): 425.17 [M+H].  
3

4 **2-Amino-4-[(2S,3S,4R,5R)-5-(6-benzylamino-purin-9-yl)-3,4-dihydroxy-tetrahydro-furan-2-  
5-ylmethylsulfanyl]-butyric acid (4, R<sub>1</sub>=Bn).** The compound was synthesized from **B** following  
6 the general procedure for step 3 and step 4. Purification by reversed phase preparative column  
7 chromatography using acetonitrile and water with 0.1% formic acid as solvents provided  
8 compound **4** (0.011g, 50%) as a white solid. ES-MS: calcd. for C<sub>21</sub>H<sub>26</sub>N<sub>6</sub>O<sub>5</sub>S (474.54); found  
9 (pos.): 476.25 [M+H]

10  
11 **2-Amino-4-[(2S,3S,4R)-3,4-dihydroxy-5-(6-phenethylamino-purin-9-yl)-tetrahydro-furan-2-  
12-ylmethylsulfanyl]-butyric acid (5, R=2-phenylethyl).**

13 The title compound (0.0023g, 18.9%) was prepared from **B** following the general procedures in  
14 step 3 and step 4. ES-MS: calcd. for C<sub>22</sub>H<sub>28</sub>N<sub>6</sub>O<sub>5</sub>S (488.57); found (pos.): 489.28 [M+H].  
15

16 **2-Amino-4-[(2S,3S,4R)-3,4-dihydroxy-5-[6-(2-methyl-benzylamino)-purin-9-yl]-tetrahydro-  
17-furan-2-ylmethylsulfanyl]-butyric acid (6, R=2-methylbenzyl).**

18 The title compound (0.014g, 43.2%) was prepared from **B** following the general procedures in  
19 step 3 and step 4.

20 <sup>1</sup>H NMR (300 MHz, DMSO-*d*<sub>6</sub>) δ ppm 8.40 (s, 1 H), 8.30 (br. s., 1 H), 8.20 (s, 1 H), 6.95 - 7.28  
21 (m, 4 H), 5.90 (d, *J*=5.9 Hz, 1 H), 4.59 - 4.81 (m, 2 H), 4.18 (dt, *J*=14.2, 3.6 Hz, 1 H), 3.97 - 4.09  
22 (m, 1 H), 2.86 - 3.02 (m, 1 H), 2.73 - 2.86 (m, 1 H), 2.63 (t, *J*=7.4 Hz, 2 H), 2.34 (s, 3 H), 1.91 -  
23 2.10 (m, 1 H), 1.70 - 1.91 (m, 1 H). ES-MS: calcd. for C<sub>22</sub>H<sub>28</sub>N<sub>6</sub>O<sub>5</sub>S (488.57); found (pos.):  
24 489.28 [M+H].  
25

26 **2-Amino-4-[(2S,3S,4R)-3,4-dihydroxy-5-[6-(3-methyl-benzylamino)-purin-9-yl]-tetrahydro-  
27-furan-2-ylmethylsulfanyl]-butyric acid (7, R=3-methylbenzyl).**

28 The title compound (0.0077g, 23.9%) was prepared from **B** following the general procedures in  
29 step 3 and step 4.

30 <sup>1</sup>H NMR (300 MHz, DMSO-*d*<sub>6</sub>) δ ppm 8.39 (s, 1 H), 8.22 (s, 1 H), 7.06 - 7.28 (m, 3 H), 6.97 -  
31 7.06 (m, 1 H), 5.90 (d, *J*=5.6 Hz, 1 H), 4.60 - 4.81 (m, 2 H), 4.08 - 4.31 (m, *J*=14.2, 4.0, 4.0 Hz, 1  
32 H), 3.96 - 4.08 (m, 1 H), 2.87 - 3.02 (m, 1 H), 2.73 - 2.86 (m, 1 H), 2.62 (t, *J*=7.6 Hz, 2 H), 2.25  
33 (s, 3 H), 1.92 - 2.08 (m, 1 H), 1.72 - 1.90 (m, 1 H). ES-MS: calcd. for C<sub>22</sub>H<sub>28</sub>N<sub>6</sub>O<sub>5</sub>S (488.57);  
34 found (pos.): 489.41 [M+H].  
35

36 **2-Amino-4-[(2S,3S,4R)-3,4-dihydroxy-5-[6-(4-methyl-benzylamino)-purin-9-yl]-tetrahydro-  
37-furan-2-ylmethylsulfanyl]-butyric acid (8, R=4-methylbenzyl).**

38 The title compound (0.017g, 34.6%) was prepared from **B** following the general procedures in  
39 step 3 and step 4.

40 <sup>1</sup>H NMR (300 MHz, DMSO-*d*<sub>6</sub>) δ ppm 8.37 (d, *J*=1.2 Hz, 1 H), 8.21 (s, 1 H), 7.21 (d, *J*=7.9 Hz, 2  
41 H), 7.08 (d, *J*=7.9 Hz, 2 H), 5.89 (d, *J*=5.9 Hz, 1 H), 4.73 (t, *J*=5.1 Hz, 1 H), 4.65 (br. s., 1 H),  
42 4.10 - 4.23 (m, 1 H), 3.94 - 4.09 (m, 1 H), 3.17 - 3.35 (m, 2 H), 2.86 - 3.00 (m, 1 H), 2.71 - 2.84  
43 (m, 1 H), 2.62 (t, *J*=7.6 Hz, 2 H), 2.26 (s, 3 H), 1.91 - 2.07 (m, 1 H), 1.69 - 1.88 (m, 1 H). ES-MS:  
44 calcd. for C<sub>22</sub>H<sub>28</sub>N<sub>6</sub>O<sub>5</sub>S (488.57); found (pos.): 489.48 [M+H].  
45

46 **2-Amino-4-[(2S,3S,4R)-5-[6-(3-bromo-benzylamino)-purin-9-yl]-3,4-dihydroxy-tetrahydro-  
47-furan-2-ylmethylsulfanyl]-butyric acid (9, R=3-bromobenzyl).**

48 The title compound (0.0143g, 35.1%) was prepared from **B** following the general procedures in  
49 step 3 and step 4 (reaction time for step 4 was 2 hours at 100°C).

1 <sup>1</sup>H NMR (300 MHz, DMSO-*d*<sub>6</sub>) δ ppm 8.47 (br. s., 1 H), 8.40 (d, *J*=1.5 Hz, 1 H), 8.24 (d, *J*=3.2  
2 Hz, 1 H), 7.49 - 7.57 (m, 1 H), 7.38 - 7.45 (m, 1 H), 7.31 - 7.38 (m, 1 H), 7.21 - 7.30 (m, 1 H),  
3 5.90 (d, *J*=5.6 Hz, 1 H), 4.63 - 4.80 (m, 2 H), 4.18 (dt, *J*=15.1, 4.4 Hz, 1 H), 3.97 - 4.09 (m, 1 H),  
4 2.86 - 3.04 (m, 1 H), 2.71 - 2.86 (m, 1 H), 2.62 (t, *J*=7.6 Hz, 2 H), 1.93 - 2.06 (m, 1 H), 1.68 -  
5 1.88 (m, 1 H). ES-MS: calcd. for C<sub>21</sub>H<sub>25</sub>BrN<sub>6</sub>O<sub>5</sub>S (553.44); found (pos.): 555.28 [M+H].  
6

7 **2-Amino-4-[(2S,3S,4R)-5-[6-(3-chloro-benzylamino)-purin-9-yl]-3,4-dihydroxy-tetrahydro-**  
8 **furan-2-ylmethylsulfanyl]-butyric acid (10, R=3-chlorobenzyl).**

9 The title compound (0.0151g, 41.9%) was prepared from **B** following the general procedures in  
10 step 3 and step 4 (reaction time for step 4 was 2 hours at 100°C).

11 <sup>1</sup>H NMR (300 MHz, DMSO-*d*<sub>6</sub>) δ ppm 8.47 (br. s., 1 H), 8.42 (d, *J*=1.2 Hz, 1 H), 8.24 (s, 1 H),  
12 7.38 - 7.42 (m, 1 H), 7.26 - 7.37 (m, 3 H), 5.92 (d, *J*=5.6 Hz, 1 H), 4.65 - 4.85 (m, 2 H), 4.19 (dt,  
13 *J*=14.9, 4.4 Hz, 1 H), 3.99 - 4.10 (m, 1 H), 2.88 - 3.03 (m, 1 H), 2.73 - 2.88 (m, 1 H), 2.64 (t,  
14 *J*=7.6 Hz, 2 H), 1.92 - 2.08 (m, 1 H), 1.71 - 1.90 (m, 1 H). ES-MS: calcd. for C<sub>21</sub>H<sub>25</sub>ClN<sub>6</sub>O<sub>5</sub>S  
15 (508.99); found (pos.): 509.25 [M+H].  
16

17 **(S)-2-Amino-4-[(2S,3S,4R,5R)-5-[6-(3-chloro-benzylamino)-purin-9-yl]-3,4-dihydroxy-**  
18 **tetrahydro-furan-2-ylmethylsulfanyl]-butyric acid (10\*, R=3-chlorobenzyl).**

19 The title compound (0.0169g, 47.1%) was prepared from (S)-4-[(2S,3S,4R,5R)-3,4-diacetoxy-5-  
20 (6-chloro-purin-9-yl)-tetrahydro-furan-2-ylmethylsulfanyl]-2-(9H-fluoren-9-  
21 ylmethoxycarbonylamino)-butyric acid methyl ester according to the general procedures for step  
22 3 and step 4.

23 <sup>1</sup>H NMR (300 MHz, DMSO-*d*<sub>6</sub>) δ ppm 8.49 (br. s., 1 H), 8.41 (s, 1 H), 8.23 (s, 1 H), 7.23 - 7.42  
24 (m, 4 H), 5.90 (d, *J*=5.9 Hz, 1 H), 4.66 - 4.80 (m, 2 H), 4.15 (t, *J*=4.5 Hz, 1 H), 3.96 - 4.07 (m, 1  
25 H), 2.92 (dd, *J*=13.8, 6.4 Hz, 1 H), 2.80 (dd, *J*=13.8, 7.0 Hz, 1 H), 2.63 (t, *J*=7.6 Hz, 2 H), 1.93 -  
26 2.08 (m, 1 H), 1.78 - 1.91 (m, 1 H). ES-MS: calcd. for C<sub>21</sub>H<sub>25</sub>ClN<sub>6</sub>O<sub>5</sub>S (508.99); found (pos.):  
27 509.40 [M+H], 507.5 [M-1].  
28

29 **2-Amino-4-[(2S,3S,4R,5R)-5-[6-(3-fluoro-benzylamino)-purin-9-yl]-3,4-dihydroxy-**  
30 **tetrahydro-furan-2-ylmethylsulfanyl]-butyric acid (11, R=3-fluorobenzyl).**

31 The title compound (0.021g, 59.3%) was prepared from **B** according to the general procedures for  
32 step 3 and step 4 (reaction time for step 4 was 2 hour at 100°C).

33 <sup>1</sup>H NMR (300 MHz, DMSO-*d*<sub>6</sub>) δ ppm 8.46 (br. s., 1 H), 8.41 (d, *J*=1.2 Hz, 1 H), 8.24 (s, 1 H),  
34 7.28 - 7.41 (m, 1 H), 7.10 - 7.24 (m, 2 H), 6.98 - 7.09 (m, 1 H), 5.92 (d, *J*=5.9 Hz, 1 H), 4.68 -  
35 4.81 (m, 2 H), 4.19 (dt, *J*=15.2, 4.2 Hz, 1 H), 3.83 - 4.20 (m, 1 H), 2.87 - 3.04 (m, 1 H), 2.73 -  
36 2.87 (m, 1 H), 2.64 (t, *J*=7.5 Hz, 2 H), 1.93 - 2.08 (m, 1 H), 1.72 - 1.90 (m, 1 H). ES-MS: calcd.  
37 for C<sub>21</sub>H<sub>25</sub>FN<sub>6</sub>O<sub>5</sub>S (492.53); found (pos.): 493.26 [M+H].  
38

39 **2-Amino-4-[(2S,3S,4R)-3,4-dihydroxy-5-[6-(3-iodo-benzylamino)-purin-9-yl]- tetrahydro-**  
40 **furan-2-ylmethylsulfanyl]-butyric acid (12, R=3-iodobenzyl).**

41 The title compound (0.0282g, 65.7%) was prepared from **B** according to the general procedures  
42 for step 3 and step 4 (reaction time for step 4 was 2 hour at 100°C).

43 <sup>1</sup>H NMR (300 MHz, DMSO-*d*<sub>6</sub>) δ ppm 8.46 (br. s., 1 H), 8.40 (d, *J*=1.5 Hz, 1 H), 8.23 (s, 1 H),  
44 7.72 (s, 1 H), 7.58 (d, *J*=7.9 Hz, 1 H), 7.36 (d, *J*=7.9 Hz, 1 H), 7.10 (t, *J*=7.8 Hz, 1 H), 5.90 (d,  
45 *J*=5.9 Hz, 1 H), 4.74 (t, *J*=4.8 Hz, 1 H), 4.66 (br. s., 1 H), 4.18 (dt, *J*=15.6, 4.2 Hz, 1 H), 3.98 -  
46 4.08 (m, 1 H), 2.86 - 3.02 (m, 1 H), 2.73 - 2.85 (m, 1 H), 2.58 (t, *J*=7.9 Hz, 2 H), 1.92 - 2.07 (m, 1  
47 H), 1.71 - 1.89 (m, 1 H). ES-MS: calcd. for C<sub>21</sub>H<sub>25</sub>IN<sub>6</sub>O<sub>5</sub>S (600.44); found (pos.): 601.38 [M+H].  
48

49 **2-Amino-4-[(2S,3S,4R,5R)-5-[6-amino-purin-9-yl]-3,4-dihydroxy-tetrahydro-furan-2-**  
50 **ylmethylsulfanyl]-butyric acid (SAH).**



1 Aqueous ammonia (30% v/v, 2mL) was added to **B** (0.035g, 0.05mmol, 1equiv.) in 1,4-dioxane  
2 (2mL) in a pressure tube. The reaction mixture was stirred at room temperature for 5 min before  
3 heating to 80°C for 3 hour. The resulting solution was concentrated, taken up in water and  
4 purified directly by reversed phase preparative column chromatography using acetonitrile and  
5 water with 0.1% formic acid as solvents to give compound the title compound **SAH** (0.011g,  
6 6%).

7 <sup>1</sup>H NMR (300 MHz, D<sub>2</sub>O) δ ppm 8.41 (s, 1 H), 8.36 (d, *J*=0.9 Hz, 1 H), 8.27 (s, 1 H), 6.08 (d,  
8 *J*=5.1 Hz, 1 H), 4.85 (t, *J*=5.3 Hz, 1 H), 4.42 (t, *J*=5.1 Hz, 1 H), 4.29 - 4.36 (m, 1 H), 3.76 - 3.83  
9 (m, 1 H), 2.90 - 3.12 (m, 2 H), 2.68 (t, *J*=7.4 Hz, 2 H), 1.98 - 2.20 (m, 2 H). ES-MS: calcd. for  
10 C<sub>14</sub>H<sub>20</sub>N<sub>6</sub>O<sub>5</sub>S (384.12); found (pos.): 385.22 [M+H].

### 16 **Supplementary information references**

17 Graves, T.L., Zhang, Y. and Scott, J.E. (2008). A universal competitive fluorescence polarization  
18 activity assay for S-adenosylmethionine utilizing methyltransferases. *Anal Biochem*, **373**, 296-  
19 306.

20  
21 Finney, D.J. (1976). Radioligand Assay. *Biometrics* **32**, 721-740.

22 Cheng Y., Prusoff W.H. (1973). Relationship between the inhibition constant (K<sub>i</sub>) and the  
23 concentration of inhibitor which causes 50 per cent inhibition (I<sub>50</sub>) of an enzymatic reaction.  
24 *Biochem. Pharmacol* **22**, 3099-3108.

25  
26 Shi, P.Y., Tilgner, M., Lo, M.K., Kent, K.A. and Bernard, K.A. (2002). Infectious cDNA clone of  
27 the epidemic West Nile virus from New York City. *J. Virol.*, **76**, 5847-5856.
